# Supplementary material for: The effects of gluteal stretching vs. Lightback® on hip rotation range of motion and posterior chain flexibility in healthy subjects: a cross-over clinical trial
Source: PeerJ. 2025 Feb 5;13:e18523. doi: 10.7717/peerj.18523 (PMC11806910; doi:10.7717/peerj.18523)
Supplement: Supplemental Information 2 [file peerj-13-18523-s002.xlsx]

## Sheet: Hoja1
Group	LIMB	DOminant_limb	Sex	age	weight	height	BMI	Femur_length	PAM	RE90ACTPRE	RI90ACTPRE	RE90PASPRE	RI90PASPRE	RE0ACTPRE	RI0ACTPRE	RE0PASPRE	RI0PASPRE	TRROM90ACTPRE	TRROM0ACTPRE	TRROM90PASPRE	TRROM0PASPRE	AKEPRE	ASLRPRE	RE90ACTPOST	RI90ACTPOST	RE90PASPOST	RI90PASPOST	RE0ACTPOST	RI0ACTPOST	RE0PASPOST	RI0PASPOST	TRROM90ACTPOST	TRROM0ACTPOST	TRROM90PASPOST	TRROM0PASPOST	AKEPOST	ASLRPOST
LIGHTBACK	RIGHT	DOMINANT	MALE	21	82	1.98	20.92	52	6	39	39	45	44	34	32	37	37	78	66	89	74	14	13	39	44	43	48	32	32	44	48	83	64	91	92	0	8
ESTIRAMIENTO	LEFT	NON DOMINANT	MALE	21	82	1.98	20.92	52	6	39	34	43	34	25	21	50	30	73	46	77	80	22	18	36	36	50	32	42	27	48	26	72	69	82	74	14	16
LIGHTBACK	LEFT	NON DOMINANT	MALE	18	60	1.62	22.86	38	12	36	36	50	39	55	29	67	46	72	89	89	113	27	26	39	36	54	39	52	38	70	52	75	90	93	122	30	22
ESTIRAMIENTO	RIGHT	DOMINANT	MALE	18	60	1.62	22.86	38	12	36	34	51	48	50	39	62	55	70	99	99	117	22	21	35	36	55	43	48	47	61	51	71	95	98	112	23	23
LIGHTBACK	RIGHT	DOMINANT	FEMALE	20	65	1.65	23.88	45	12	33	48	36	54	38	44	50	64	81	82	90	114	6	5	27	52	34	60	52	50	61	67	79	102	94	128	6	0
ESTIRAMIENTO	LEFT	NON DOMINANT	FEMALE	20	65	1.65	23.88	45	12	36	43	40	42	50	37	47	53	79	87	82	100	7	5	39	40	46	40	54	50	56	57	79	104	86	113	6	5
LIGHTBACK	LEFT	NON DOMINANT	FEMALE	19	53	1.63	19.95	42	12	35	53	39	67	50	64	55	79	88	114	106	134	31	25	34	52	47	69	49	66	60	82	86	115	116	142	31	25
ESTIRAMIENTO	RIGHT	DOMINANT	FEMALE	19	53	1.63	19.95	42	12	35	40	46	55	56	61	68	63	75	117	101	131	32	36	30	41	45	57	60	59	62	60	71	119	102	122	21	27
LIGHTBACK	RIGHT	DOMINANT	FEMALE	19	55	1.6	21.48	41	6	33	29	51	44	49	42	54	47	62	91	95	101	35	28	36	34	54	41	55	36	60	48	70	91	95	108	32	24
ESTIRAMIENTO	LEFT	NON DOMINANT	FEMALE	19	55	1.6	21.48	41	6	30	37	40	50	47	49	53	52	67	96	90	105	25	30	28	42	34	52	46	50	60	58	70	96	86	118	30	23
LIGHTBACK	LEFT	DOMINANT	MALE	18	69	1.76	22.28	42.5	3	32	34	45	42	56	41	53	55	66	97	87	108	24	24	34	41	35	45	52	47	58	50	75	99	80	108	21	20
ESTIRAMIENTO	RIGHT	NON DOMINANT	MALE	18	69	1.76	22.28	42.5	3	34	42	47	40	55	44	53	43	76	99	87	96	27	25	43	28	50	36	53	46	58	45	71	99	86	103	22	23
ESTIRAMIENTO	LEFT	DOMINANT	MALE	19	82	1.75	26.78	44	12	31	46	33	45	37	33	45	40	77	70	78	85	35	28	32	38	43	45	48	40	50	47	70	88	88	97	32	30
LIGHTBACK	RIGHT	NON DOMINANT	MALE	19	82	1.75	26.78	44	12	29	36	41	36	44	34	51	36	65	78	77	87	38	35	31	36	44	42	51	35	56	43	67	86	86	99	28	30
ESTIRAMIENTO	RIGHT	DOMINANT	MALE	21	81	1.84	23.92	45	9	32	35	40	41	36	41	40	46	67	77	81	86	35	27	33	40	38	45	37	47	44	42	71	84	86	86	32	26
LIGHTBACK	LEFT	NON DOMINANT	MALE	21	81	1.84	23.92	45	9	35	28	40	34	36	24	44	27	63	60	74	71	38	36	38	33	46	40	46	42	56	45	73	88	83	101	30	28
ESTIRAMIENTO	LEFT	NON DOMINANT	MALE	19	68	1.73	22.72	41	15	28	40	30	48	42	37	45	52	68	79	78	97	40	48	25	37	29	47	32	40	48	55	62	72	76	103	39	43
LIGHTBACK	RIGHT	DOMINANT	MALE	19	68	1.73	22.72	41	15	38	18	46	31	58	28	65	32	56	86	77	97	41	45	42	22	53	39	60	40	74	38	64	100	92	112	34	44
ESTIRAMIENTO	RIGHT	DOMINANT	MALE	20	76	1.82	22.94	43	13	36	36	48	42	60	35	64	38	72	95	90	102	35	33	33	30	51	37	62	37	67	42	63	99	88	109	44	40
LIGHTBACK	LEFT	NON DOMINANT	MALE	20	76	1.82	22.94	43	13	34	34	45	36	53	33	54	41	68	86	81	95	45	37	37	33	52	38	68	35	75	45	70	103	90	120	24	24
LIGHTBACK	LEFT	NON DOMINANT	FEMALE	21	44	1.53	18.8	38	17	42	48	49	47	48	50	54	54	90	98	96	108	25	26	44	43	46	49	48	48	48	55	87	96	95	103	21	22
ESTIRAMIENTO	RIGHT	DOMINANT	FEMALE	21	44	1.53	18.8	38	17	32	51	40	56	36	53	40	53	83	89	96	93	26	25	34	45	42	51	39	50	44	54	79	89	93	98	23	22
LIGHTBACK	RIGHT	DOMINANT	MALE	20	76	1.85	22.21	45	7	40	42	47	43	46	39	51	50	82	85	90	101	24	33	46	39	52	47	50	42	52	50	85	92	99	102	25	25
ESTIRAMIENTO	LEFT	NON DOMINANT	MALE	20	76	1.85	22.21	45	7	38	40	41	46	42	36	43	47	78	78	87	90	22	25	40	39	40	50	42	40	45	47	79	82	90	92	25	30
LIGHTBACK	LEFT	NON DOMINANT	FEMALE	22	70	1.64	26.03	41	15	35	35	46	40	43	44	48	46	70	87	86	94	22	18	46	38	45	38	49	49	53	53	84	98	83	106	6	14
ESTIRAMIENTO	RIGHT	DOMINANT	FEMALE	22	70	1.64	26.03	41	15	32	43	43	46	45	45	45	53	75	90	89	98	22	18	32	41	41	51	32	52	42	55	73	84	92	97	3	10
LIGHTBACK	RIGHT	DOMINANT	MALE	19	69	1.79	21.53	46	6	38	39	40	45	45	45	48	48	77	90	85	96	24	10	37	42	45	43	46	44	50	52	79	90	88	102	6	1
ESTIRAMIENTO	LEFT	NON DOMINANT	MALE	19	69	1.79	21.53	46	6	36	42	38	41	36	41	40	47	78	77	79	87	21	18	30	36	35	41	40	40	46	46	66	80	76	92	20	20
LIGHTBACK	LEFT	NON DOMINANT	MALE	22	73	1.85	21.33	44	8	20	48	38	64	34	66	38	70	68	100	102	108	18	22	28	46	40	65	33	75	42	80	74	108	105	122	15	13
ESTIRAMIENTO	RIGHT	DOMINANT	MALE	22	73	1.85	21.33	44	8	36	46	36	54	50	53	54	62	82	103	90	116	18	17	33	45	45	54	49	56	48	61	78	105	99	109	17	23
LIGHTBACK	RIGHT	DOMINANT	FEMALE	20	61	1.7	21.11	45	11	33	37	45	40	40	44	42	57	70	84	85	99	31	25	30	40	46	53	41	51	46	62	70	92	99	108	19	25
ESTIRAMIENTO	LEFT	NON DOMINANT	FEMALE	20	61	1.7	21.11	45	11	31	42	36	50	32	50	41	54	73	82	86	95	21	24	33	38	40	52	35	43	41	55	71	78	92	96	15	18
LIGHTBACK	LEFT	NON DOMINANT	FEMALE	18	68	1.74	22.46	45	9	28	37	43	48	45	46	48	50	65	91	91	98	27	21	36	48	42	50	51	52	55	58	84	103	92	113	18	8
ESTIRAMIENTO	RIGHT	DOMINANT	FEMALE	18	68	1.74	22.46	45	9	36	38	46	45	36	51	45	55	74	87	91	100	21	20	32	44	39	50	46	51	48	57	76	97	89	105	15	20
ESTIRAMIENTO	RIGHT	NON DOMINANT	MALE	20	86	1.85	25.13	44	12	27	43	34	52	35	57	33	56	70	92	86	89	32	24	26	44	35	46	35	56	38	54	70	91	81	92	23	20
LIGHTBACK	LEFT	DOMINANT	MALE	20	86	1.85	25.13	44	12	32	44	40	51	40	45	40	50	76	85	91	90	33	26	32	45	42	46	44	47	45	55	77	91	88	100	23	23
ESTIRAMIENTO	LEFT	NON DOMINANT	MALE	19	63	1.7	21.8	42	9	42	40	44	50	45	42	46	52	82	87	94	98	25	20	40	40	50	50	52	46	54	55	80	98	100	109	22	19
LIGHTBACK	RIGHT	DOMINANT	MALE	19	63	1.7	21.8	42	9	37	43	51	43	46	52	49	54	80	98	94	103	22	21	41	44	56	50	52	50	54	55	85	102	106	109	14	17
ESTIRAMIENTO	RIGHT	DOMINANT	MALE	21	95	1.75	31.02	39	5	40	29	42	30	52	25	56	31	69	77	72	87	30	27	40	28	47	33	46	27	58	35	68	73	80	93	30	31
LIGHTBACK	LEFT	NON DOMINANT	MALE	21	95	1.75	31.02	39	5	31	36	38	38	50	32	51	38	67	82	76	89	27	27	38	37	40	44	58	32	67	38	75	90	84	105	24	22
ESTIRAMIENTO	LEFT	NON DOMINANT	MALE	19	82	1.82	24.76	43	5	36	52	37	54	48	44	51	49	88	92	91	100	19	19	35	50	41	54	55	45	61	51	85	100	95	112	22	20
LIGHTBACK	RIGHT	DOMINANT	MALE	19	82	1.82	24.76	43	5	39	41	46	45	52	42	58	46	80	94	91	104	14	13	37	43	44	43	54	45	64	49	80	99	87	113	17	16
ESTIRAMIENTO	RIGHT	DOMINANT	MALE	21	77	1.79	24.03	43	4	27	38	38	45	50	37	62	50	65	87	83	112	18	17	24	42	36	43	41	35	56	48	66	76	79	104	16	10
LIGHTBACK	LEFT	NON DOMINANT	MALE	21	77	1.79	24.03	43	4	31	35	48	45	51	24	64	40	66	75	93	104	16	19	31	34	45	47	44	30	71	43	65	74	92	114	12	5
ESTIRAMIENTO	LEFT	NON DOMINANT	MALE	20	66	1.89	18.48	46	10	34	34	40	40	32	29	38	34	68	61	80	72	33	35	35	35	40	41	42	26	43	35	70	68	81	78	30	26
LIGHTBACK	RIGHT	DOMINANT	MALE	20	66	1.89	18.48	46	10	26	38	35	39	27	40	28	43	64	67	74	71	34	28	36	38	48	46	28	44	32	43	74	72	94	75	28	23
LIGHTBACK	RIGHT	DOMINANT	MALE	21	85	1.88	24.05	44	6	30	31	30	35	34	36	34	42	61	70	65	76	34	20	31	29	43	35	35	30	38	37	60	65	78	75	14	18
ESTIRAMIENTO	LEFT	NON DOMINANT	MALE	21	86	1.88	24.33	44	6	32	31	41	38	38	26	38	32	63	64	79	70	30	30	28	40	36	49	33	27	38	36	68	60	85	74	15	22
LIGHTBACK	LEFT	NON DOMINANT	MALE	20	87	1.85	25.42	47	5	26	36	38	40	35	31	45	36	62	66	78	81	31	26	31	30	34	38	36	26	42	33	61	62	72	75	24	21
ESTIRAMIENTO	RIGHT	DOMINANT	MALE	20	87	1.85	25.42	47	5	31	26	41	37	39	25	45	27	57	64	78	72	31	27	32	28	43	38	29	24	38	27	60	53	81	65	26	27
LIGHTBACK	RIGHT	NON DOMINANT	MALE	24	80	1.77	25.54	41	12	43	37	56	40	45	32	46	37	80	77	96	83	17	17	47	34	55	34	63	32	67	41	81	95	89	108	15	14
ESTIRAMIENTO	LEFT	DOMINANT	MALE	24	80	1.77	25.54	41	12	40	38	45	40	45	33	48	42	78	78	85	90	18	19	43	44	45	36	58	40	67	45	87	98	81	112	15	17
LIGHTBACK	LEFT	NON DOMINANT	MALE	24	80	1.91	21.93	43	11	24	36	35	45	42	36	55	44	60	78	80	99	34	35	32	40	43	45	57	36	54	41	72	93	88	95	32	31
ESTIRAMIENTO	RIGHT	DOMINANT	MALE	24	80	1.91	21.93	43	11	35	30	49	37	50	34	56	37	65	84	86	93	25	26	40	25	54	31	52	34	58	37	65	86	85	95	29	29
LIGHTBACK	RIGHT	DOMINANT	FEMALE	20	51	1.57	20.69	42	6	40	38	43	41	43	40	46	40	78	83	84	86	3	5	40	42	45	50	43	38	44	40	82	81	95	84	2	0
ESTIRAMIENTO	LEFT	NON DOMINANT	FEMALE	20	51	1.57	20.69	42	6	28	40	30	48	32	53	32	52	68	85	78	84	4	0	30	45	31	50	30	52	33	54	75	82	81	87	3	0
LIGHTBACK	LEFT	NON DOMINANT	FEMALE	22	49	1.59	19.38	39	6	40	38	46	42	46	35	48	45	78	81	88	93	24	22	42	35	55	47	47	37	53	46	77	84	102	99	20	21
ESTIRAMIENTO	RIGHT	DOMINANT	FEMALE	22	49	1.59	19.38	39	6	41	34	46	43	48	31	49	43	75	79	89	92	30	24	36	34	53	44	50	30	52	42	70	80	97	94	25	28
ESTIRAMIENTO	RIGHT	DOMINANT	FEMALE	20	52	1.69	18.21	43	6	36	45	43	52	40	54	45	56	81	94	95	101	7	-12	30	42	42	52	37	60	40	64	72	97	94	104	7	-7
LIGHTBACK	LEFT	NON DOMINANT	FEMALE	20	52	1.69	18.21	43	6	30	48	34	57	28	67	29	69	78	95	91	98	0	-7	31	50	36	64	30	71	30	74	81	101	100	104	0	-9
ESTIRAMIENTO	LEFT	NON DOMINANT	FEMALE	26	58	1.63	21.83	40	11	31	44	36	52	37	48	37	55	75	85	88	92	0	-8	30	41	40	50	40	54	41	58	71	94	90	99	-2	-15
LIGHTBACK	RIGHT	DOMINANT	FEMALE	26	58	1.63	21.83	40	11	37	43	44	53	36	52	36	53	80	88	97	89	-2	-7	31	41	43	50	37	45	39	48	72	82	93	87	0	-18
